# Supplementary material for: Secondary Metabolites from Piper crocatum as Natural Inhibitors of Oral Pathogens: In Vitro and In Silico Insights into Streptococcus mutans and Candida albicans
Source: Research Square preprint supplement (doi:10.21203/rs.3.rs-7679103/v1), 2025-11-04
Supplement: Supplementary file 1 [file fd00b8fa410a88832c32acd6.docx]

**SUPPLEMENTARY MATERIALS**

**Secondary Metabolites from Piper crocatum as Natural Inhibitors of Oral Pathogens: *In Vitro* and *In Silico* Insights into Streptococcus mutans and Candida albicans**

Dikdik Kurnia1*, Hendra Dian Adhita Dharsono2, Denny Nurdin2, Norma Aura Tristyaningrum1, Eti Apriyanti1, Syifa Zahara Kultsum Azmi1

1Department of Chemistry, Faculty of Mathematics and Natural Sciences, Universitas Padjadjaran, Sumedang 45363, Indonesia;

2Department of Conservative Dentistry, Faculty of Dentistry, Universitas Padjadjaran, Sumedang 45363, Indonesia.

Correspondence should be addressed to Dikdik Kurnia; dikdik.kurnia@unpad.ac.id

# General

NMR spectra were recorded on Bruker Avance Neo 700MHz NMR spectrometers (1H: 700 MHz, 13C: 175 MHz). ESI-TQD-MS were calculated on Acquity TQD, Waters Corporation, MA, USA. IR spectra were recorded on Shimidzu 4800. TLC was carried out on pre-coated silica-gel F254 aluminum sheets (0.25 mm thickness, E. Merck). The spots were visualized by heating after spraying with 10% H2SO4 ­in methanol.


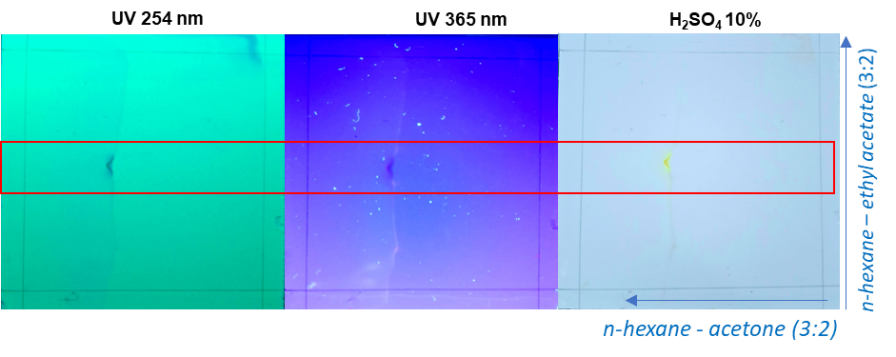


Figure S-1. Two-dimensional thin layer chromatographic of compound **1**.


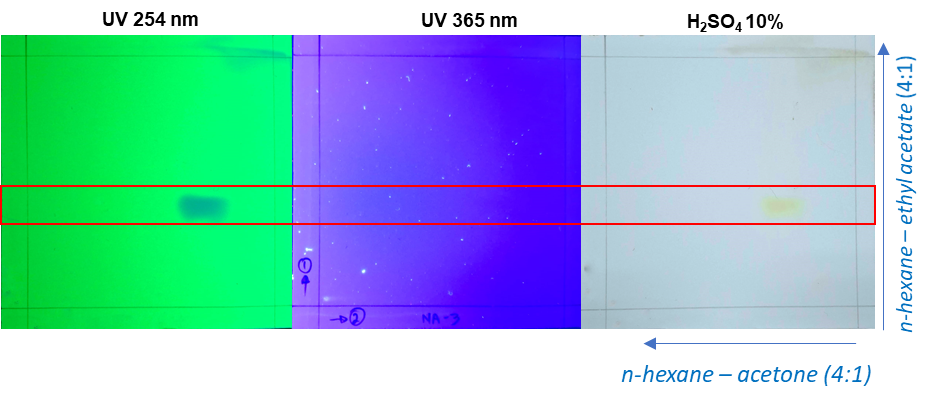


Figure S-2. Two-dimensional thin layer chromatographic analysis of compound **2.**

1. **Structural Characterization of Compound 1**
2. IR Spectrum


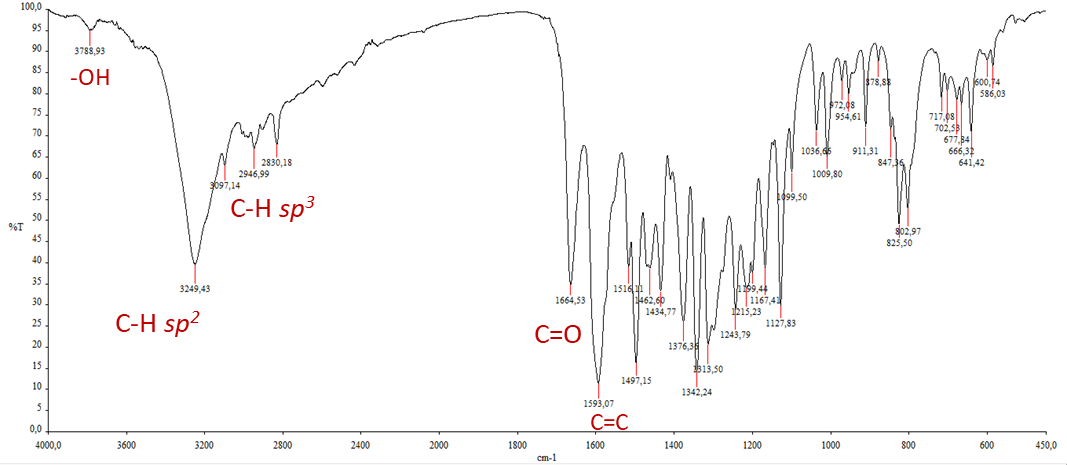


Figure S-3. IR spectrum of compound **1** (KBr)

1. **13C-NMR and DEPT Spectra of Pachypodol (1)**


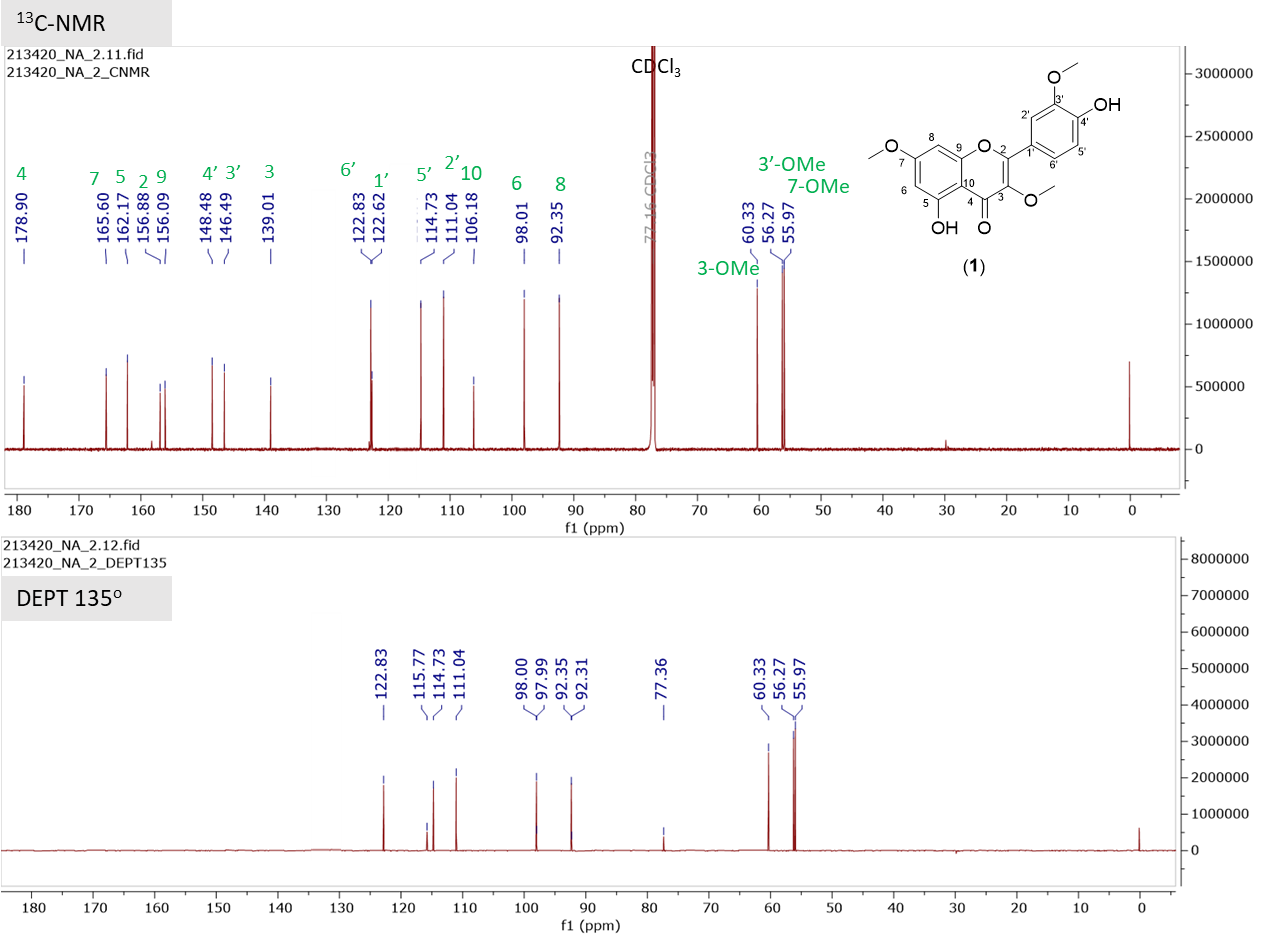


Figure S-4. 13C-NMR (175 MHz, CDCl3) and DEPT 135o spectrum of **1** in CDCl3

# 1H-NMR Spectrum of Pachypodol (1)


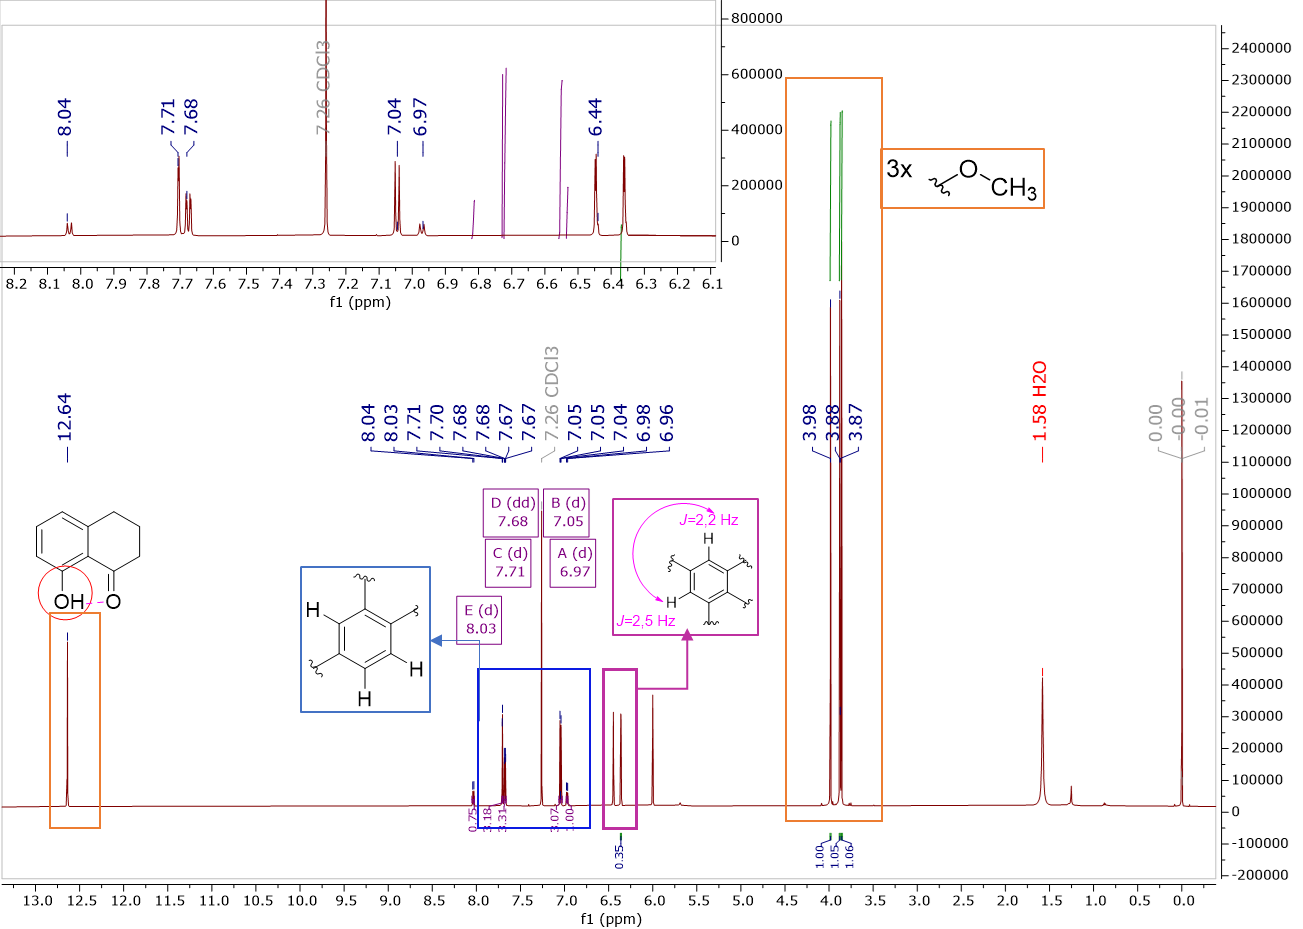


Figure S-5. 1H-NMR (700 MHz, CDCl3) spectrum of **1** in CDCl3.

Table S-1. 1H and 13C-NMR spectrum data of compound **1**

| **No.** | **Compound 1** (CDCl3; 1H-NMR 700 MHz; 13C-NMR 175 MHz) | |
| --- | --- | --- |
|  | **(, mult, *J=*Hz)** |
| 2 | 156.9 | - |
| 3 | 139.0 | - |
| 4 | 178.9 | - |
| 5 | 162.2 | - |
| 6 | 98.0 | 6.37 (1H; *d; J=*2.5) |
| 7 | 165.6 | - |
| 8 | 92.3 | 6.46 (1H; *d: J*=2.2) |
| 9 | 156.1 | - |
| 10 | 106.2 | - |
| 1' | 122.6 | - |
| 2' | 111.0 | 7.71 (1H; *dd: J=*1.98) |
| 3' | 146.5 | - |
| 4' | 148.5 | - |
| 5' | 114.7 | - |
| 6' | 122.8 | 7.68 (1H. *dd*; *J=* 2.02; 8.4) |
| 3-OMe | 60.3 | 3.86 (3H, *s)* |
| 7-OMe | 56.0 | 3.88 (3H, *s*) |
| 3'-OMe | 56.3 | 3.98 (3H, *s*) |
| 5-OH | - | 12.64 (1H, *s*) |

1. **HSQC Spectrum of Pachypodol (1)**

**
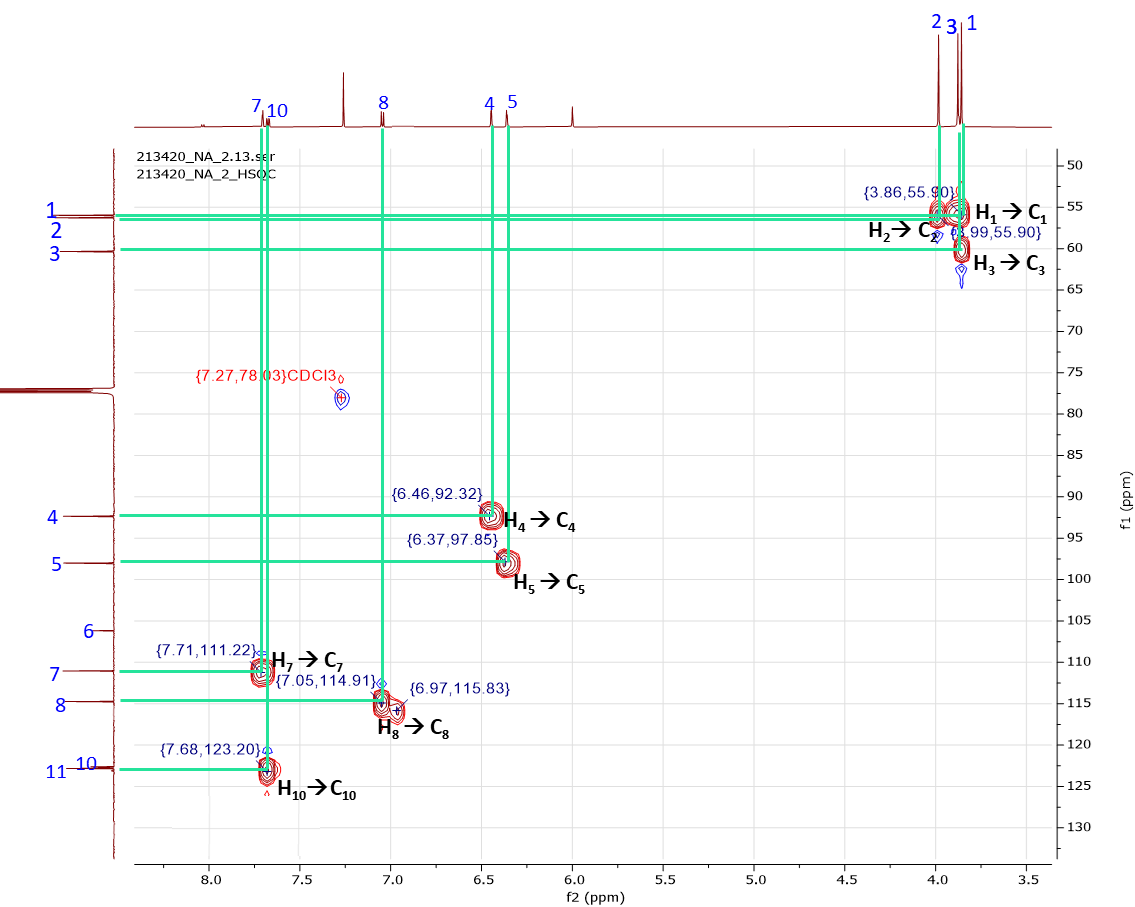
**

Figure S-6. HSQC spectrum of compound **1** in CDCl3

# 1H-1H COSY Spectrum of Pachypodol (1)


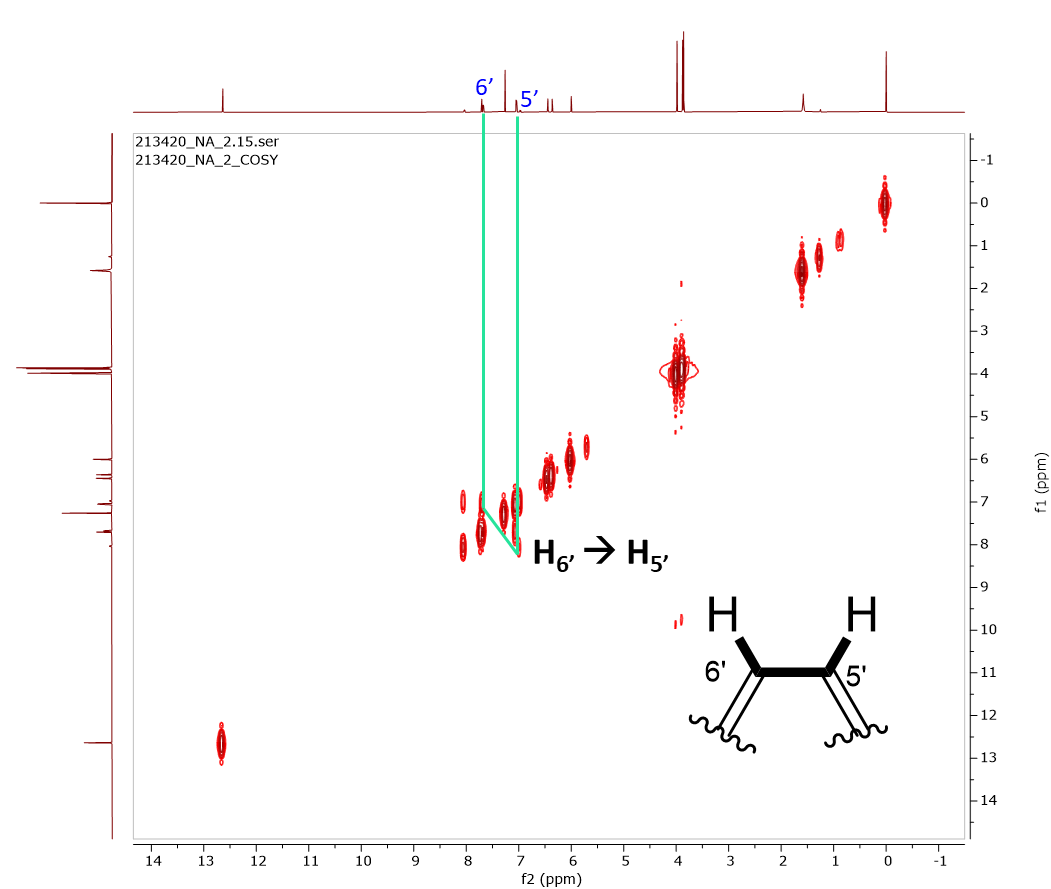


Figure S-7. ­1H-1H COSY spectrum of compound **1** inCDCl3

# HMBC Spectrum of Pachypodol (1)


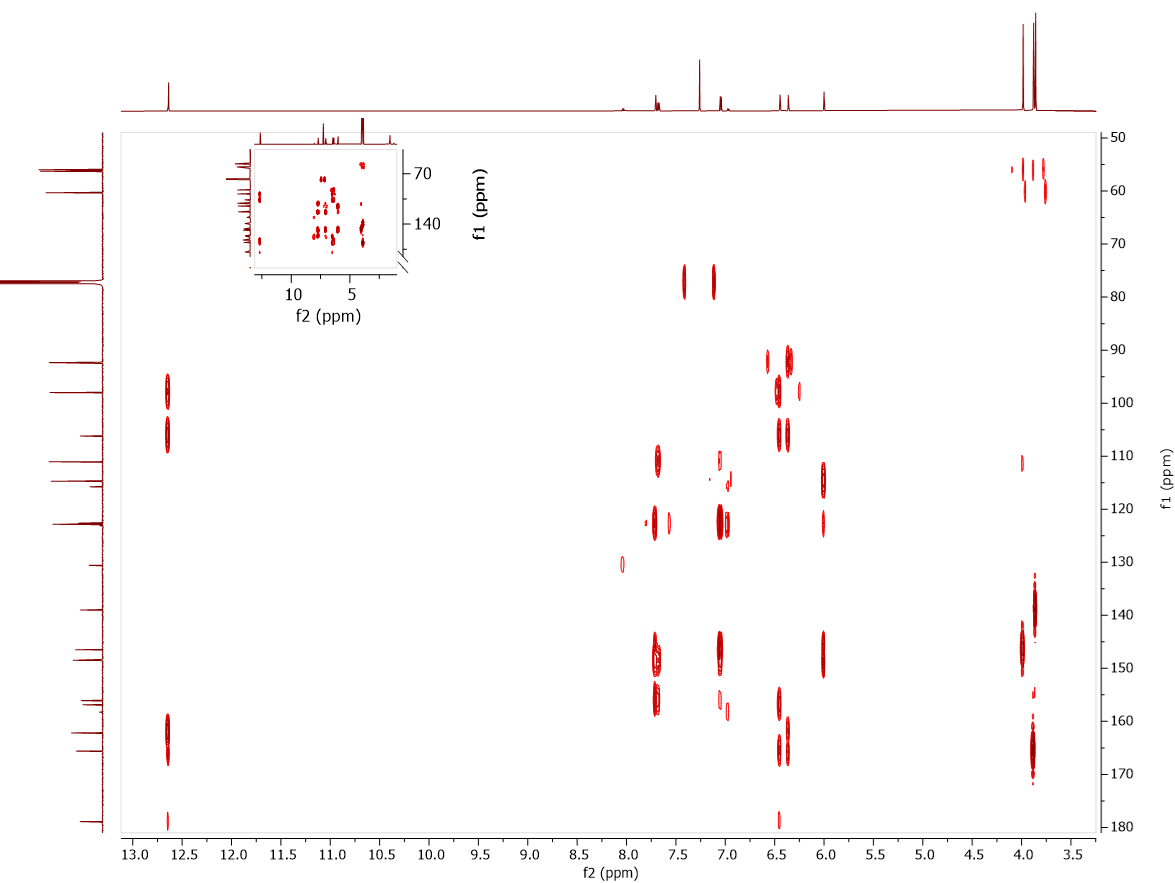


Figure S-8. HMBC Spectrum of compound **1** inCDCl3


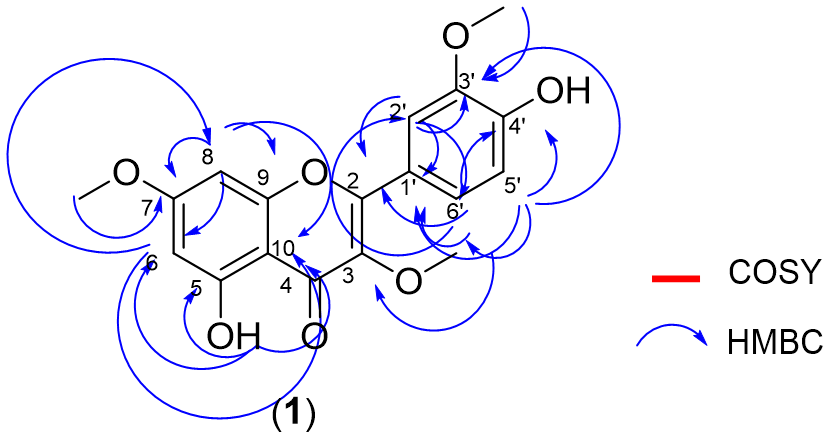


Figure S-9. H-H COSY and selected HMBC (HC) correlations of compound **1**

1. **Mass Spectrum of Compound 1**

**
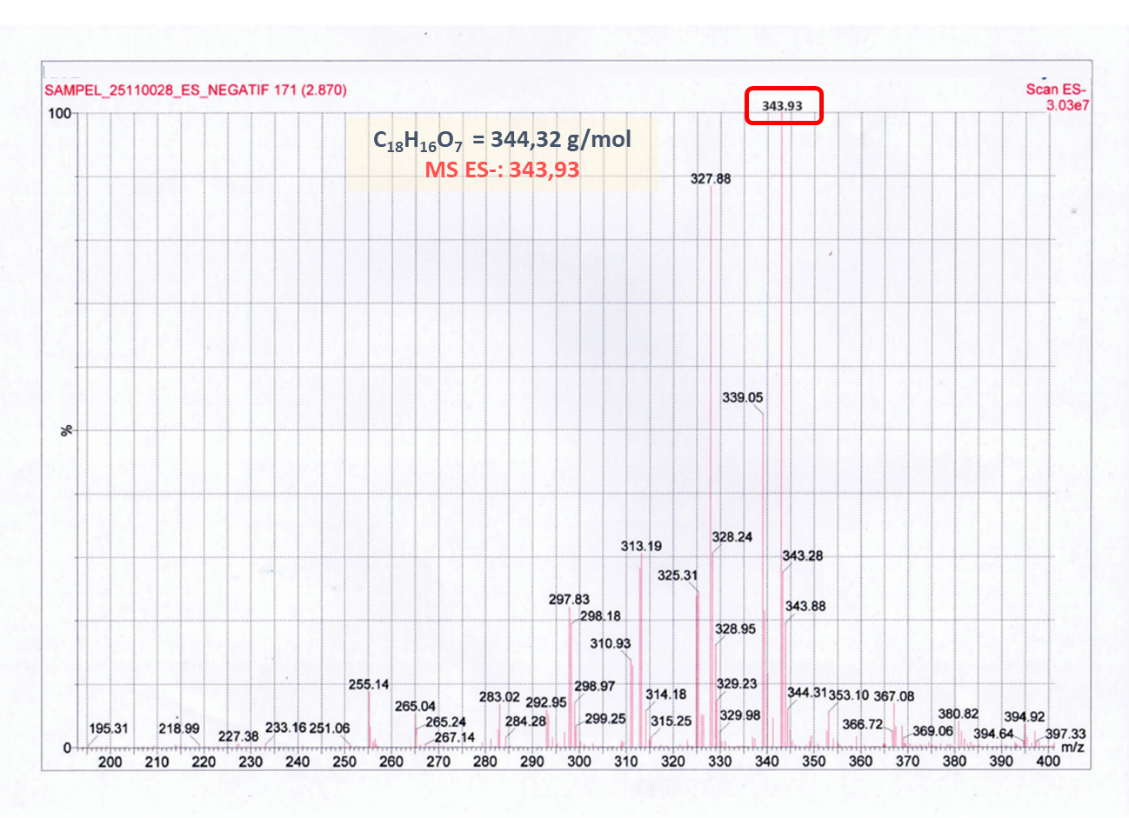
**

Figure S-10. MS spectrum of compound **1**.

1. **Structural Characterization of Compound 2**
2. IR Spectrum


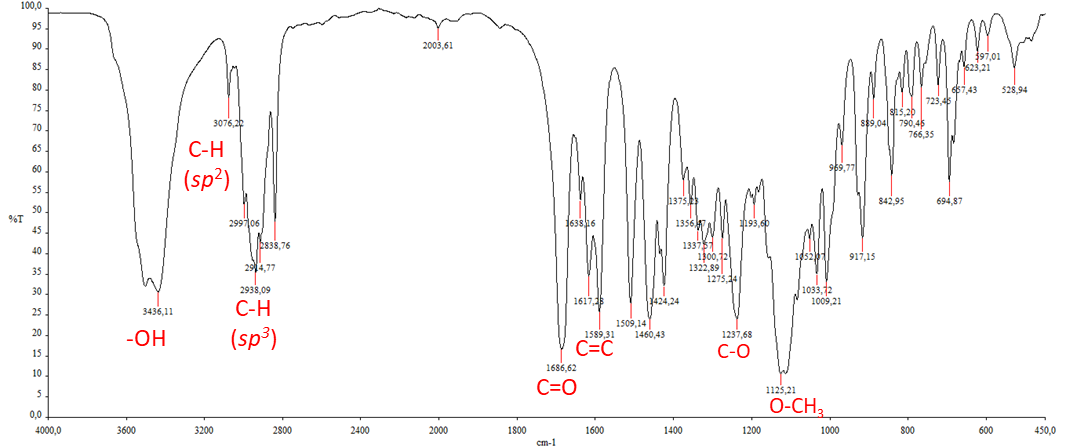


Figure S-11. IR spectrum of compound **2** (KBr)

1. **13C-NMR and DEPT Spectra of Nectamazin B (2)**


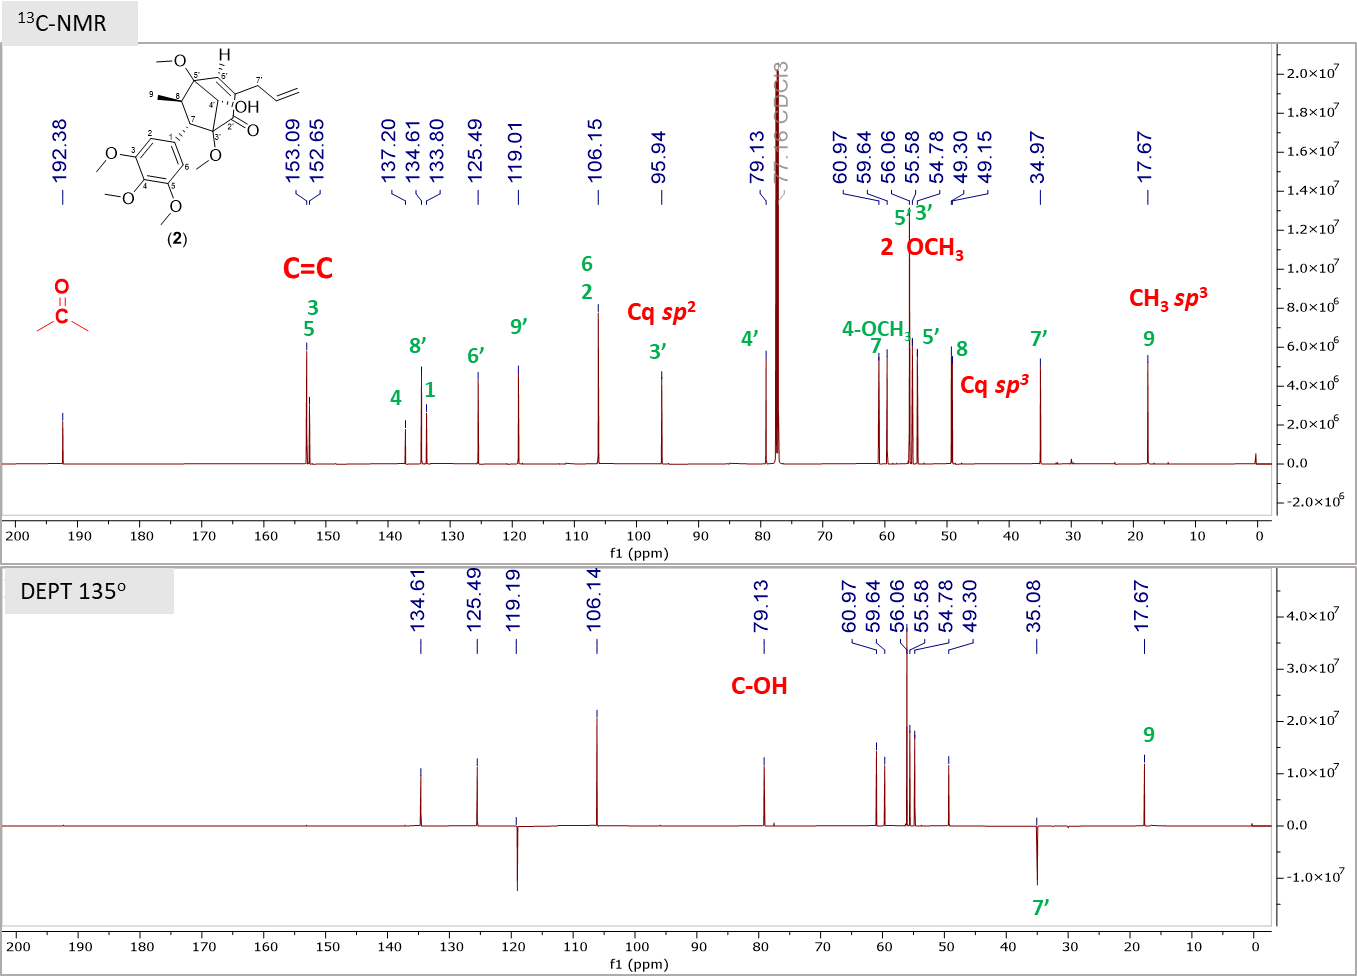


Figure S-12. 13C-NMR (175 MHz, CDCl3) and DEPT 135o spectrum of **2** in CDCl3

# 1H-NMR Spectrum of Nectamazin B (2)


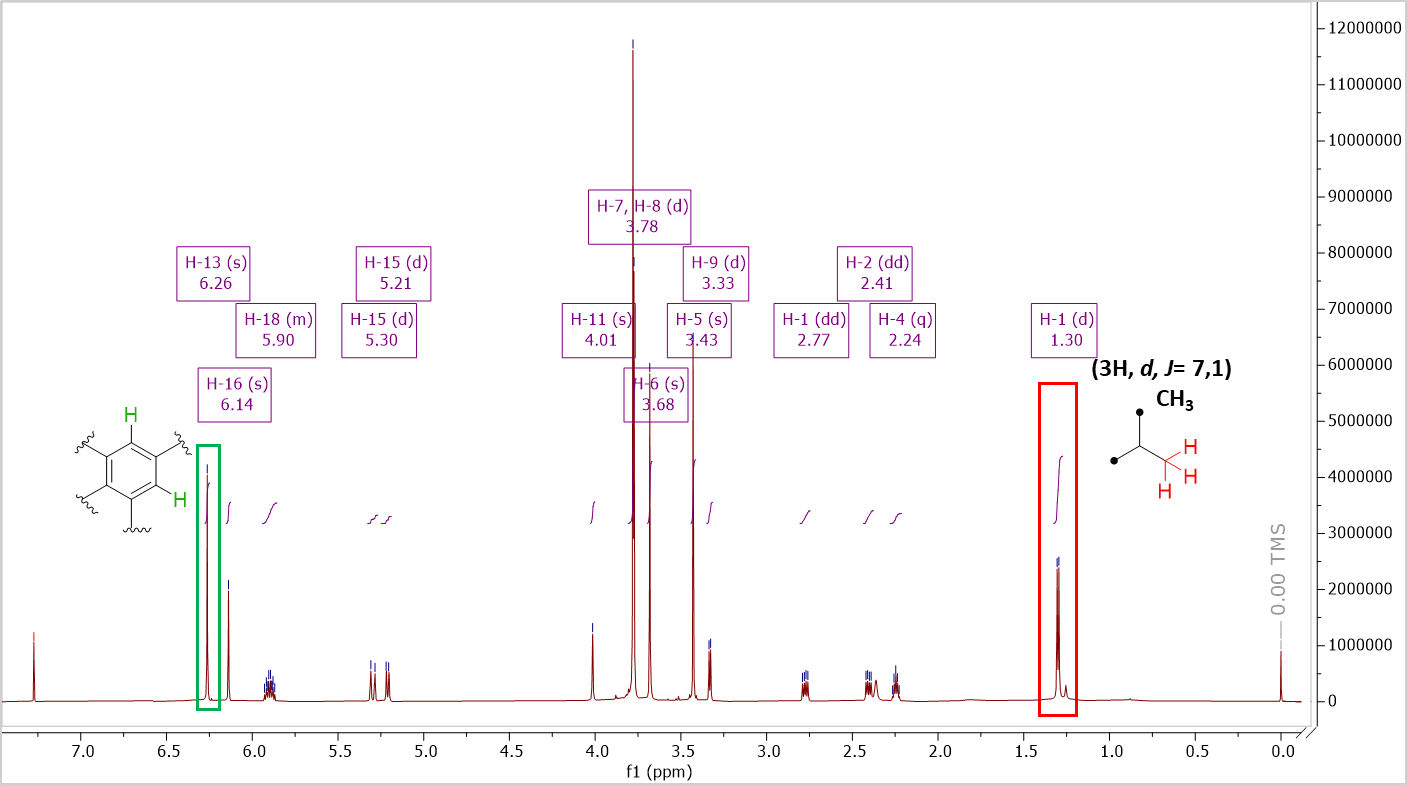


Figure S-13. 1H-NMR (700 MHz, CDCl3) spectrum of **2** in CDCl3.

Table S-2. 1H and 13C-NMR spectrum data of compound **2**

| **No.** | **Compound 2**(CDCl3; 1H-NMR 700 MHz; 13C-NMR 175 MHz) | |
| --- | --- | --- |
| **(ppm)** | **(, mult, *J=*Hz)** |
| 1 | 133.8 | - |
| 2 | 106.2 | 6.28 (1H. *s*) |
| 3 | 153.1 | - |
| 4 | 137.2 | - |
| 5 | 153.1 | - |
| 6 | 106.2 | 6.26 (1H. *s*) |
| 7 | 59.6 | 3.33 (1H. *d*. *J*=6.5) |
| 8 | 49.3 | (1H. *m*) |
| 9 | 17.7 | 1.30 (3H. *d*. *J*=7.1) |
| 1' | 137.2 | - |
| 2' | 192.4 | - |
| 3' | 95.9 | - |
| 4' | 79.1 | 4.01 (1H. *s*) |
| 5' | 95.9 | - |
| 6' | 125.2 | 6.14 (1H. *s*) |
| 7' | 35.0 | 2.77 (2H. d. *J*=7.0) |
| 8' | 134.6 | 5.90 (1H. *ddt*. *J*=10.2; 17.0) |
| 9' | 119.0 | 5.21-5.30 (2H. *m*) |
| 3-OMe | 55.6 | 3.68 (3H. *s*) |
| 5-OMe | 56.1 | 3.78 (3H. *s*) |
| 4-OMe | 61.0 | 3.77 (3H. *s*) |
| 3'OMe | 56.1 | 3.78 (3H. *s*) |
| 5՛-OMe | 54.8 | 3.43 (3H. *s*) |

1. **HSQC Spectrum of Nectamazin B (2)**

Figure S-14. HSQC spectrum of compound **2** in CDCl3

# 1H-1H COSY Spectrum of Nectamazin B (2)


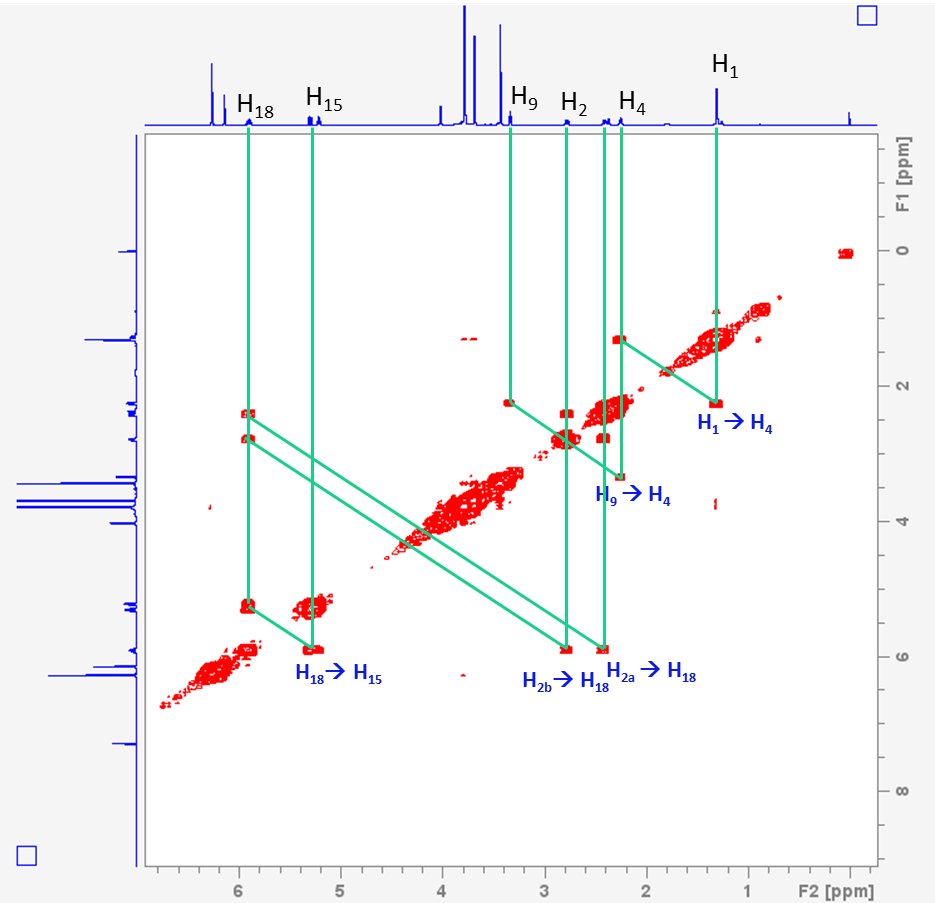


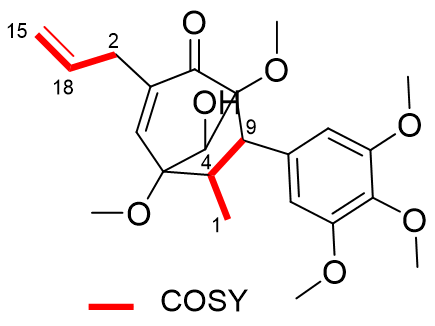


Figure S-15. ­1H-1H COSY spectrum of compound **2** inCDCl3

# HMBC Spectrum of Nectamazin B (2)


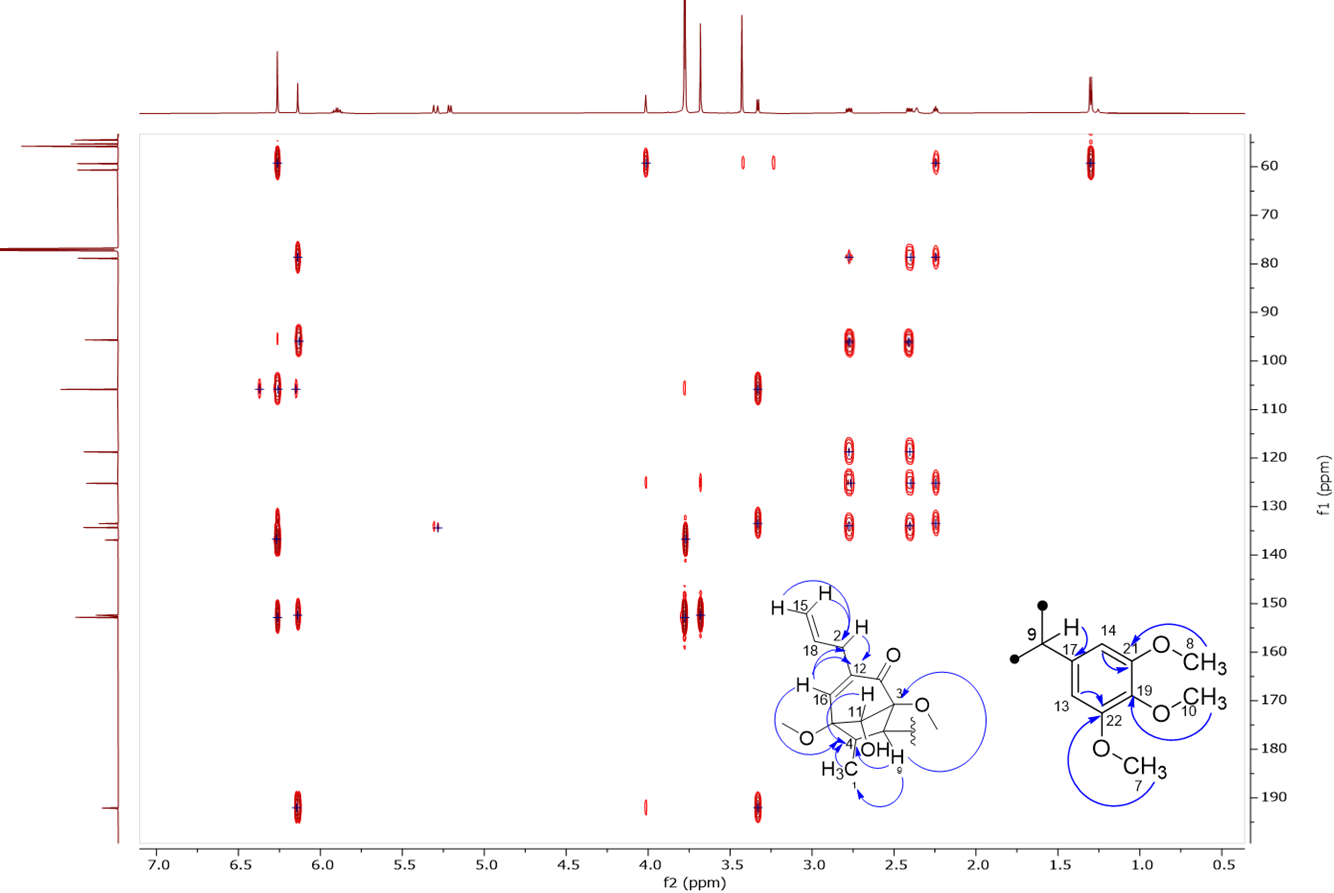


Figure S-16. HMBC Spectrum and correlation of compound **2** inCDCl3

1. **NOESY Spectrum of Nectamazin B (2)**


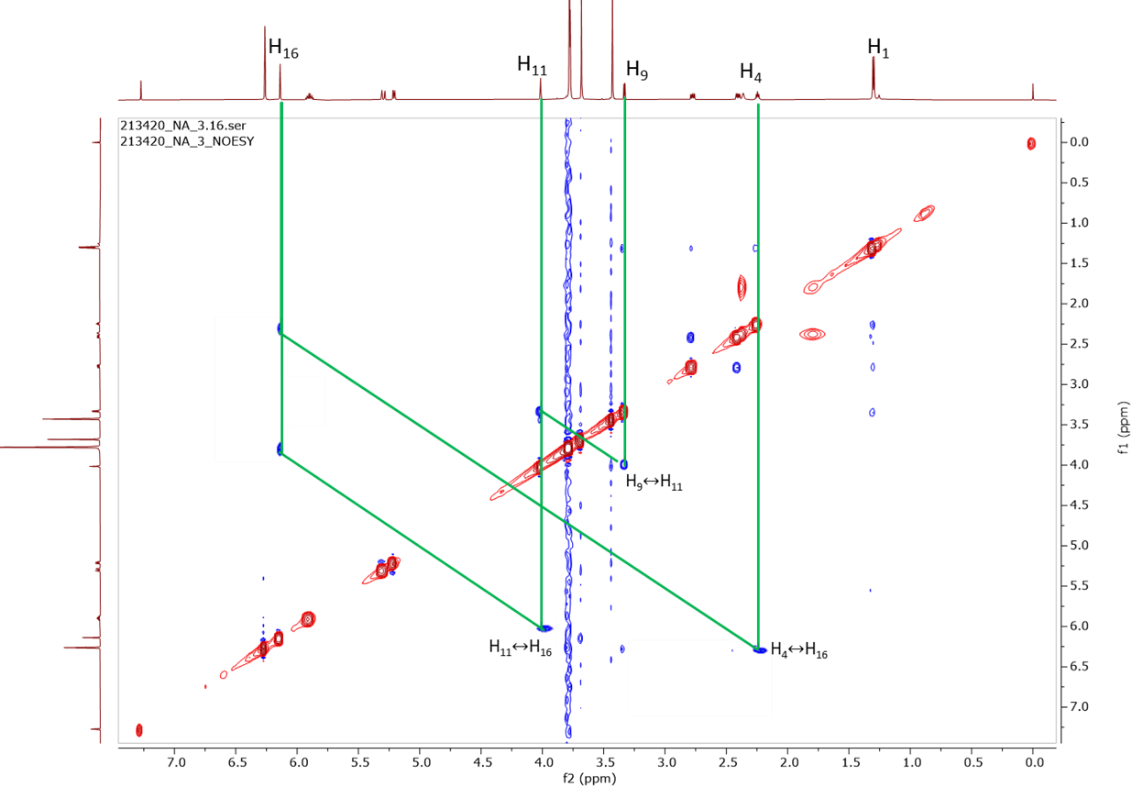


Figure S-17. NOESY Spectrum and correlation of compound **2**

1. **Mass Spectrum of Compound 2**


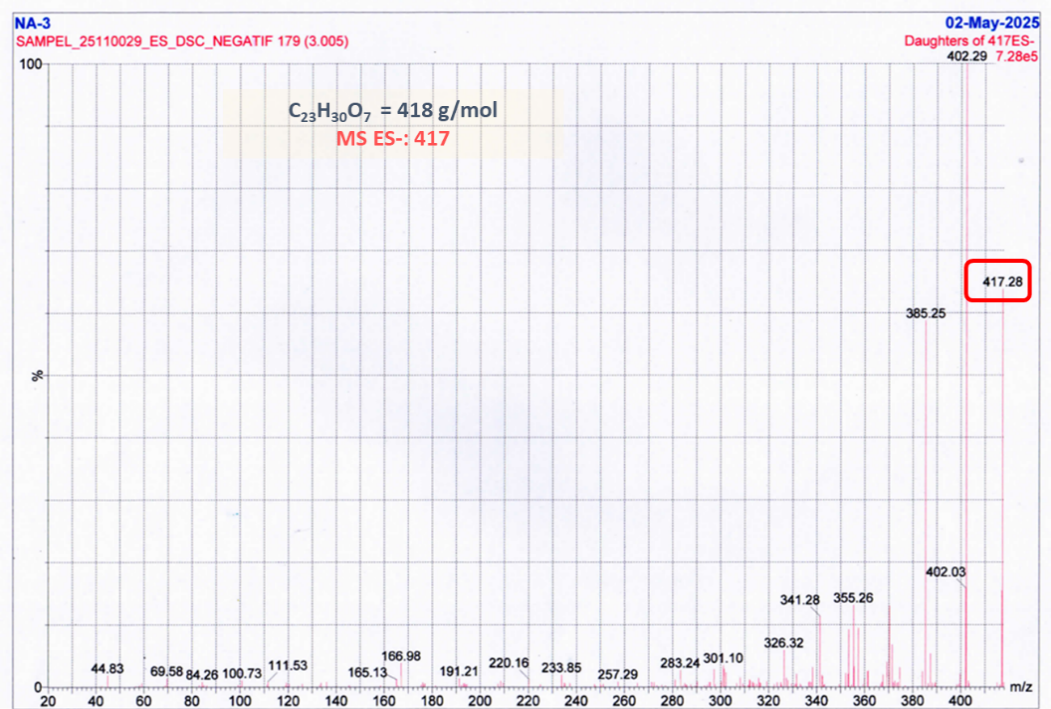


Figure S-10. MS spectrum of compound **2**
